# Supplementary material for: The cooperation of charge transfer and electron transfer for manipulating photothermal behaviour of donor–acceptor co-crystals
Source: Royal Society of Chemistry journal article supplement (doi:10.1039/d3ce00581j), 2023-01-01
Supplement: d3ce00581j1.pdf [file d3ce00581j1.pdf]

## Supplementary Information

### **The cooperation of charge transfer and electron transfer for manipulating photothermal behaviour of donor-acceptor co-crystals**

Jia-Qi Pan, Yun-Rui Chen, Meng-Ze Jia, Xin-Rong Yao, Xiao-Li Miao, Jie Zhang\*

MOE Key Laboratory of Cluster Science, Beijing Key Laboratory of Photoelectronic/Electrophotonic Conversion Materials, School of Chemistry and Chemical Engineering, Beijing Institute of Technology, Beijing 102488, P. R. China. E-mail: zhangjie68@bit.edu.cn

#### **Table of content**

|                             |          |
|-----------------------------|----------|
| Supplementary Table .....   | <b>2</b> |
| Supplementary Figures ..... | <b>3</b> |

## Supplementary Tables

### X-ray crystallography

**Table S1.** Crystal Data and Structural Refinement Parameters of **CTC-1OH** and **CTC-2OH**

| Compound name                                                 | CTC-1OH                                                                      | CTC-2OH                                                       |
|---------------------------------------------------------------|------------------------------------------------------------------------------|---------------------------------------------------------------|
| Structural formula                                            | H <sub>2</sub> BCbpe·2Hbdc-<br>OH·0.5H <sub>2</sub> bdc-OH·4H <sub>2</sub> O | BCbpe·H <sub>2</sub> bdc-(OH) <sub>2</sub> ·H <sub>2</sub> O  |
| Empirical formula                                             | C <sub>40</sub> H <sub>39</sub> N <sub>2</sub> O <sub>18.5</sub>             | C <sub>28</sub> H <sub>24</sub> N <sub>2</sub> O <sub>9</sub> |
| Formula weight                                                | 843.73                                                                       | 532.49                                                        |
| Temperature (K)                                               | 298                                                                          | 298                                                           |
| Crystal system                                                | triclinic                                                                    | orthorhombic                                                  |
| Space group                                                   | <i>P</i> -1                                                                  | <i>P</i> 2 <sub>1</sub> 2 <sub>1</sub> 2 <sub>1</sub>         |
| <i>a</i> (Å)                                                  | 8.2694                                                                       | 4.7835                                                        |
| <i>b</i> (Å)                                                  | 8.7155                                                                       | 43.651                                                        |
| <i>c</i> (Å)                                                  | 26.765                                                                       | 11.3771                                                       |
| $\alpha$ (°)                                                  | 87.121                                                                       | 90                                                            |
| $\beta$ (°)                                                   | 85.505                                                                       | 90                                                            |
| $\gamma$ (°)                                                  | 80.356                                                                       | 90                                                            |
| Volume (Å <sup>3</sup> )                                      | 1894.6                                                                       | 2375.64                                                       |
| <i>Z</i>                                                      | 2                                                                            | 4                                                             |
| D <sub>calcd</sub> (g/cm <sup>3</sup> )                       | 1.479                                                                        | 1.489                                                         |
| Absorption coefficient (mm <sup>-1</sup> )                    | 0.119                                                                        | 0.113                                                         |
| <i>F</i> (000)                                                | 882.0                                                                        | 1112.0                                                        |
| Reflections collected                                         | 22553/9057                                                                   | 23001/4156                                                    |
| GOOF on <i>F</i> <sup>2</sup>                                 | 1.037                                                                        | 1.135                                                         |
| R <sub>1</sub> , wR <sub>2</sub> ( <i>I</i> > 2σ( <i>I</i> )) | R <sub>1</sub> = 0.0551, wR <sub>2</sub> = 0.1372                            | R <sub>1</sub> = 0.1661, wR <sub>2</sub> = 0.4510             |
| R <sub>1</sub> , wR <sub>2</sub> (all data)                   | R <sub>1</sub> = 0.0952, wR <sub>2</sub> = 0.1637                            | R <sub>1</sub> = 0.1739, wR <sub>2</sub> = 0.4690             |

## Supplementary Figures

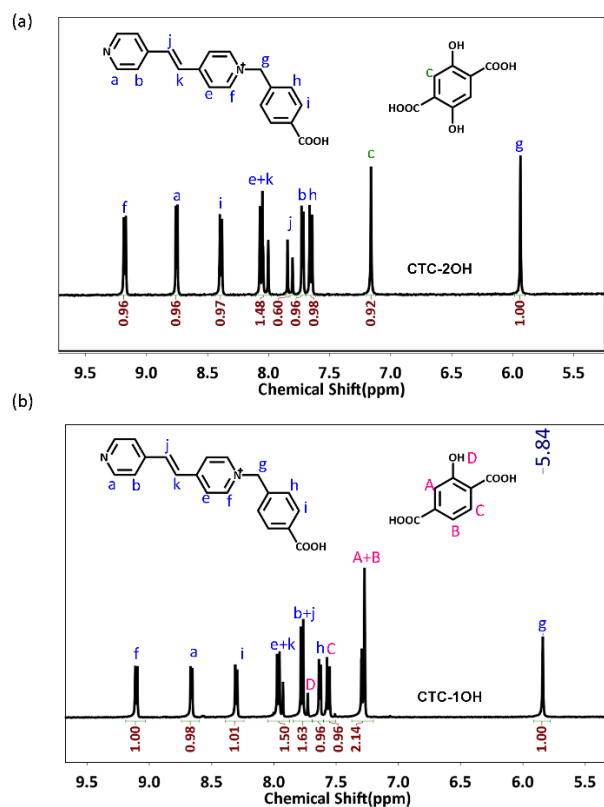

**Fig. S1** <sup>1</sup>H NMR spectra (400 MHz, d<sub>6</sub>-DMSO) of **CTC-2OH** (a) and **CTC-1OH** (b), and the attribution of characteristic peaks.

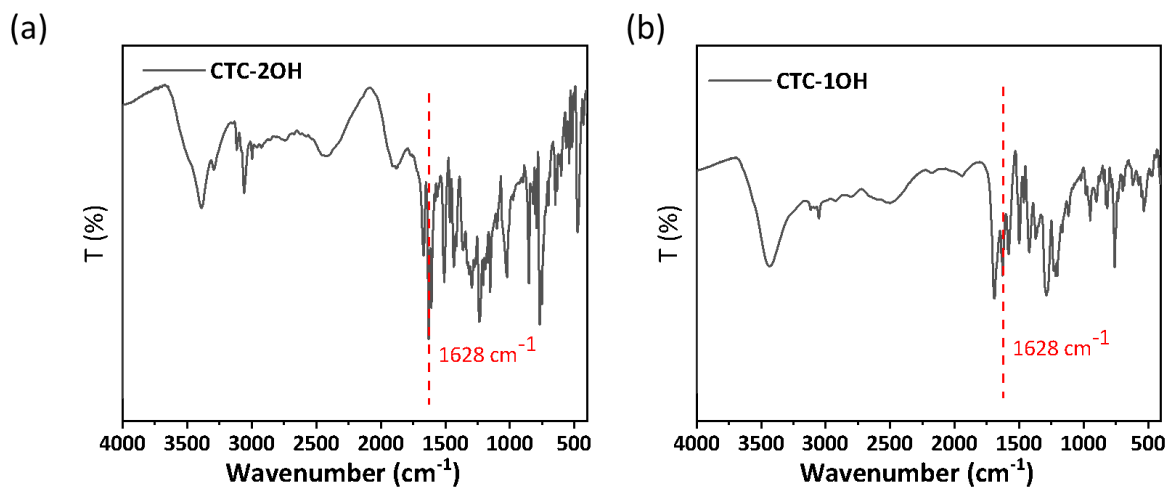

**Fig. S2** FT-IR spectra of **CTC-2OH** (a) and **CTC-1OH** (b).

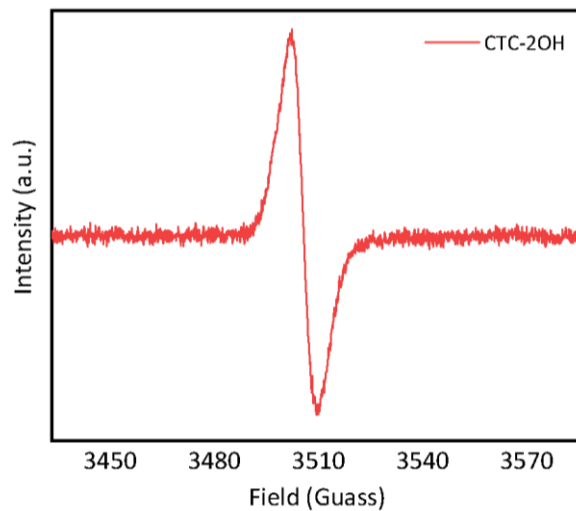

**Fig. S3** ESR spectrum of **CTC-2OH** in the solid-state under an air atmosphere at room temperature.

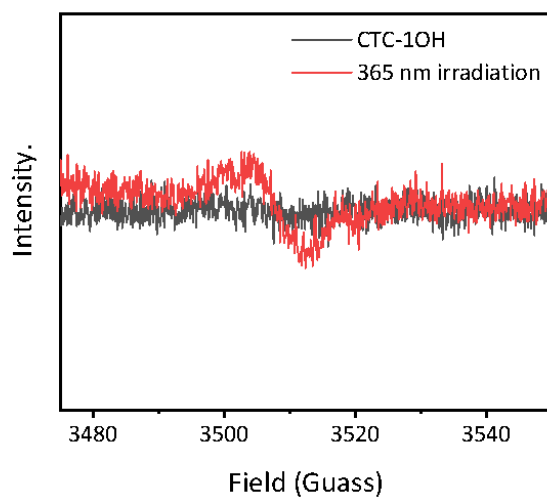

**Fig. S4** ESR spectra of **CTC-1OH** in the solid-state before and after 365 nm light irradiation.

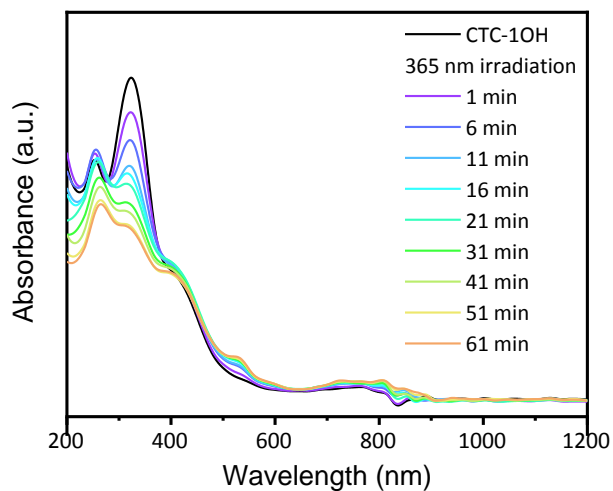

**Fig. S5** Time-dependent UV-Vis-NIR spectral change of **CTC-1OH** in solid state upon 365 nm light irradiation.

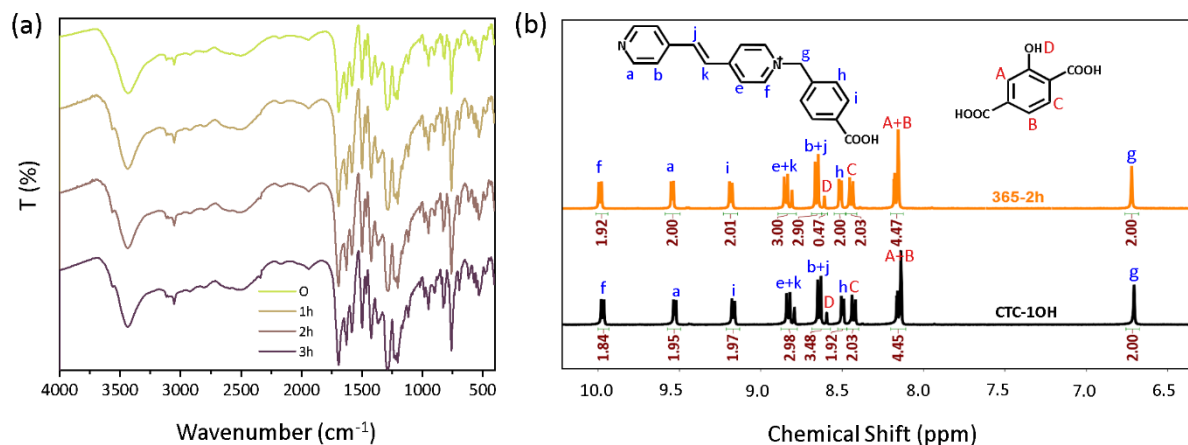

**Fig. S6** (a) IR and (b)  $^1\text{H}$  NMR spectra of CTC-10H before and after 365 nm light irradiation.

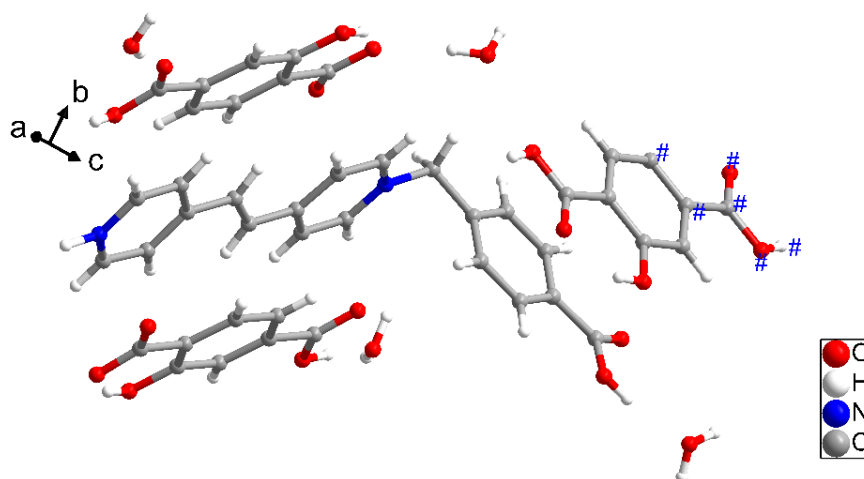

**Fig. S7** The crystallographically asymmetric unit in CTC-10H (The atoms marked # are generated by symmetric operation).

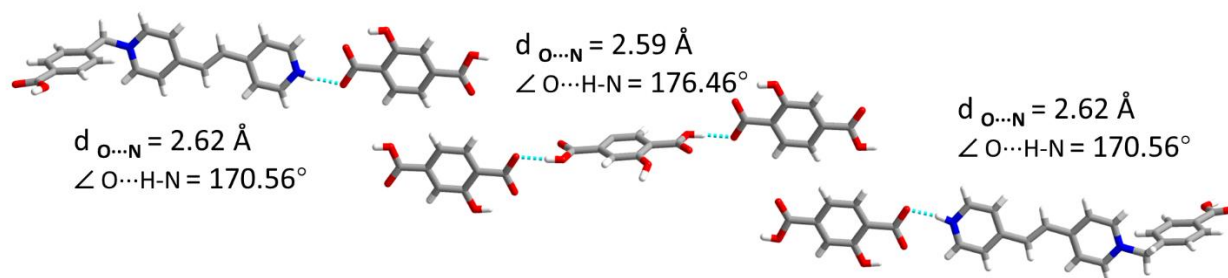

**Fig. S8** The hydrogen bonds between adjacent  $\text{H}_2\text{BCbpe}^{2+}$ ,  $\text{Hbdc-OH}^-$  and  $\text{H}_2\text{bdc-OH}$  in CTC-10H.

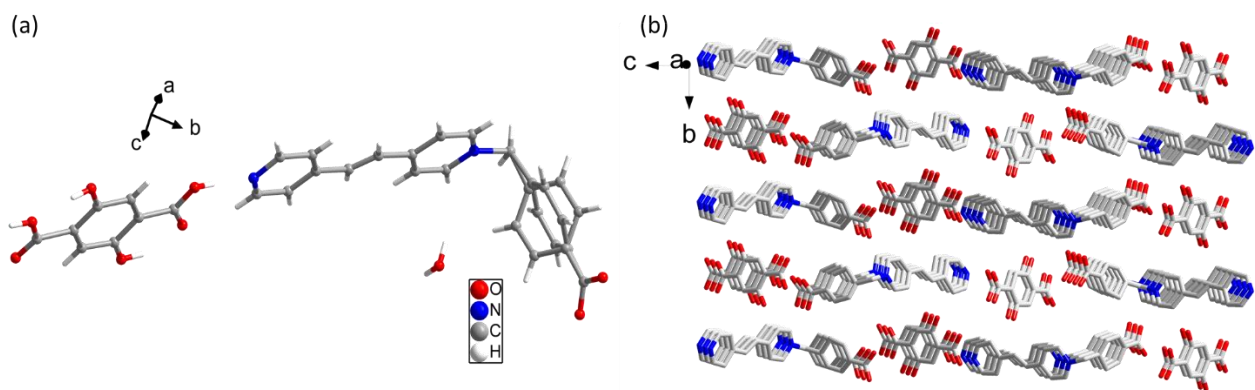

**Fig. S9** (a) The crystallographically asymmetric unit and (b) three-dimensional supramolecular stacking of **CTC-2OH**.

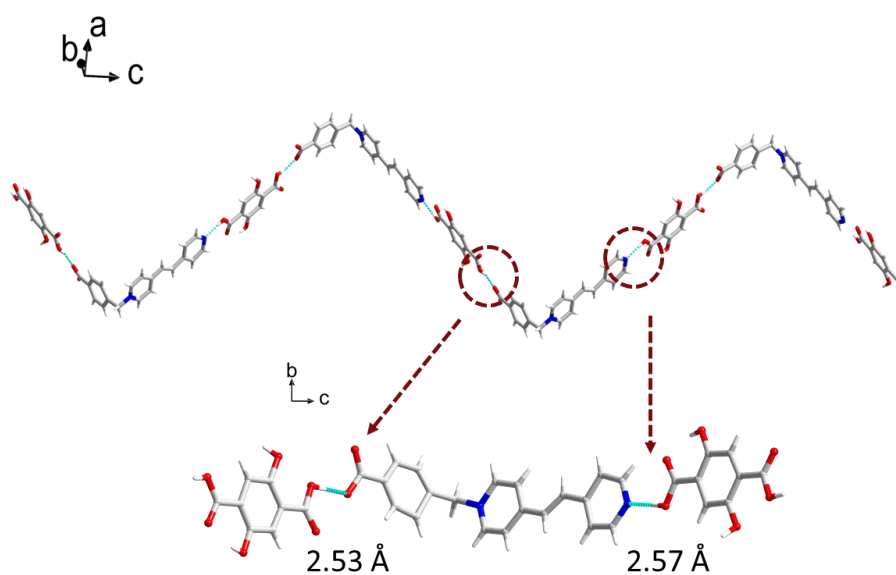

**Fig. S10** The hydrogen bonds between adjacent BCbpe and  $\text{H}_2\text{bdc}(\text{OH})_2$  in “Z” type chain. The “head” and “tail” moieties of BCbpe are connected to  $\text{H}_2\text{bdc}(\text{OH})_2$  by two types of hydrogen bonds:  $\text{O}-\text{H}\cdots\text{O}$  hydrogen bonds ( $d_{\text{O}\cdots\text{O}} = 2.53 \text{ \AA}$ ) and  $\text{O}-\text{H}\cdots\text{N}$  hydrogen bonds ( $d_{\text{O}\cdots\text{N}} = 2.57 \text{ \AA}$ ) in **CTC-2OH**.

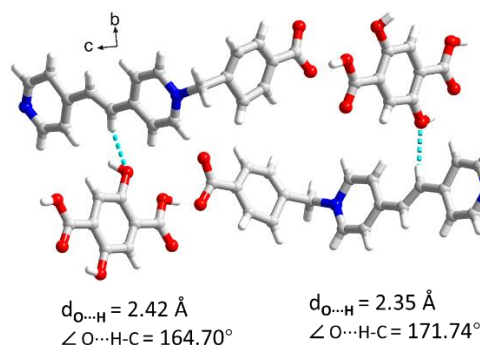

**Fig. S11** The adjacent BCbpe ligands and  $\text{H}_2\text{bdc}(\text{OH})_2$  ligands are connected by interchain hydrogen bonds:  $\text{C}-\text{H}\cdots\text{O}$  hydrogen bonds ( $d_{\text{C}\cdots\text{O}} = 2.66 \text{ \AA}$ ) in **CTC-2OH**.

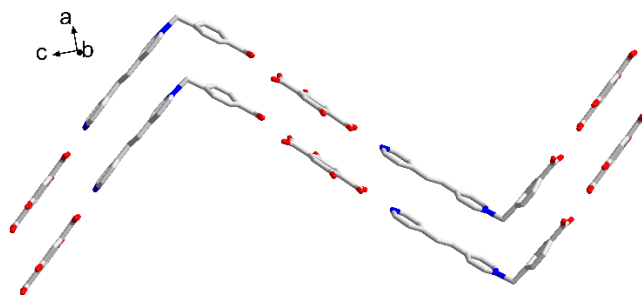

**Fig. S12** pile-up sequences and Z-shaped arrangement in **CTC-2OH**.

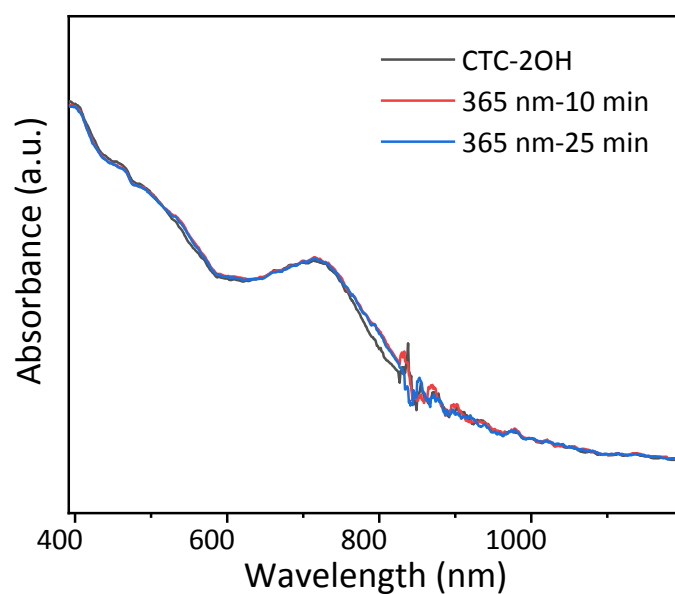

**Fig. S13** UV-Vis-NIR spectral change of **CTC-2OH** in the solid-state-upon 365 nm light irradiation.

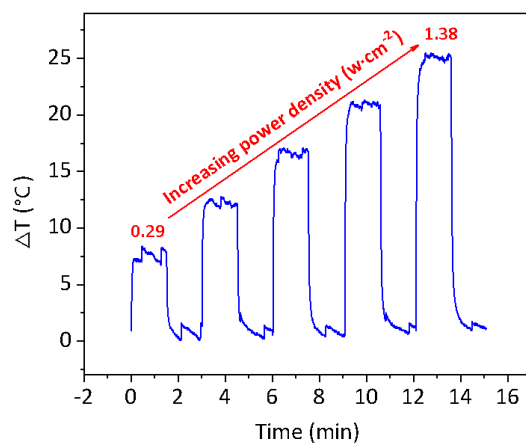

**Fig. S14** Photothermal conversion curves of **CTC-10H** co-crystal upon exposure to NIR laser at varied power densities.

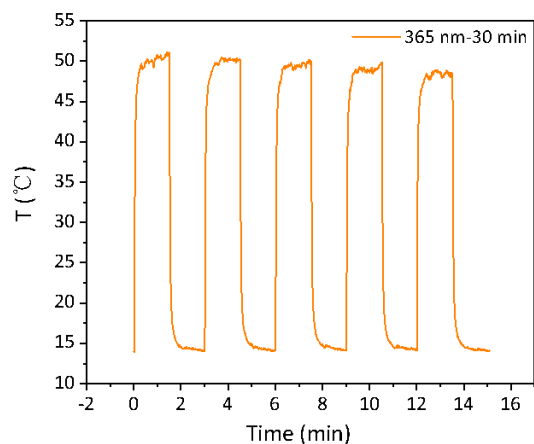

**Fig. S15** Photothermal conversion curves of the photo-irradiated **CTC-1OH** (365 nm light for 30 min) during five cycles of heating and cooling processes.

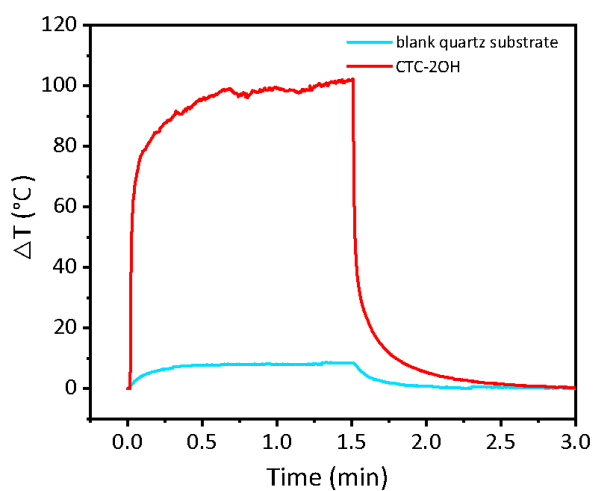

**Fig. S16** Temperature transformation curves of **CTC-2OH** co-crystal and its blank quartz substrate upon exposure to 808 nm laser with power density of  $1.38 \text{ W}\cdot\text{cm}^{-2}$ .

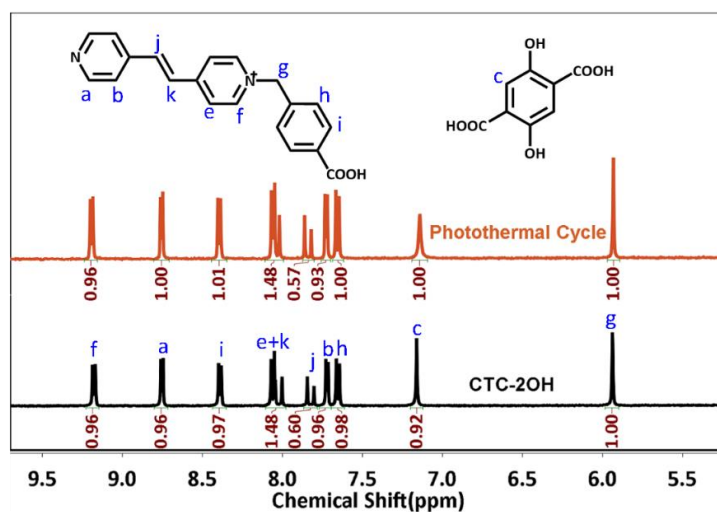

**Fig. S17**  $^1\text{H}$  NMR spectra and the attribution of characteristic peaks of **CTC-2OH** after 10 photothermal cycles via 808 nm laser.



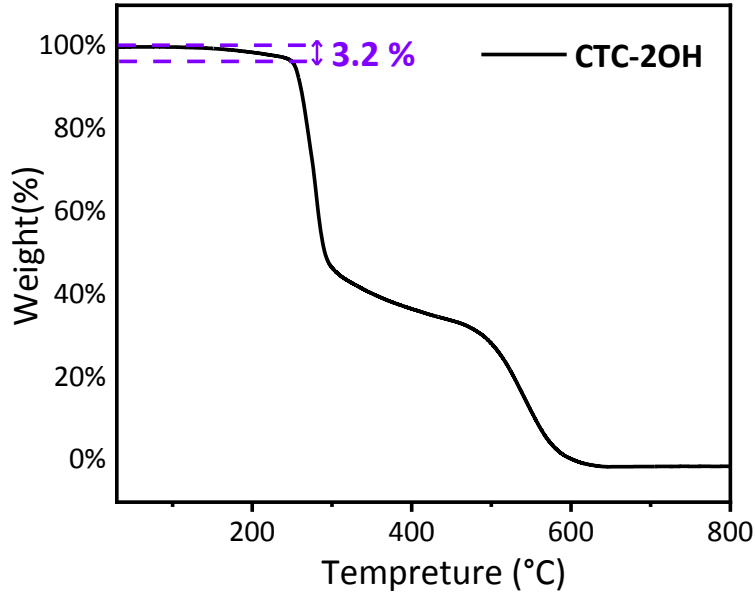

**Fig. S18** Thermogravimetric curve of **CTC-2OH**.

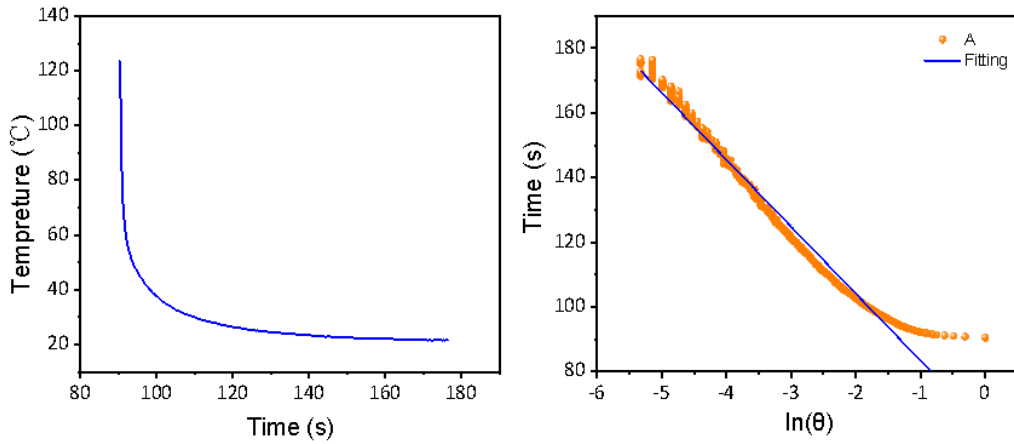

**Fig. S19** Cooling curve (a) of the **CTC-2OH** irradiated by 808 nm laser ( $1.38 \text{ W}\cdot\text{cm}^{-2}$ ) and its corresponding time- $\ln\theta$  linear curve; the calculated value of  $\tau_s$  is 29.7 s.

**Calculation of photothermal efficiency ( $\eta_{\text{CTC-2OH}}$ )**

The photothermal conversion efficiency ( $\eta$ ) is obtained according to Equation (1).

$$\eta = \frac{hA(T_{\text{Max}} - T_{\text{surr}}) - Q_{\text{Dis}}}{I(1 - 10^{-A_{808}})} \quad (1)$$

In equation (1),  $T_{\text{Max}}$  is the maximum steady-state temperature (123.4 °C),  $T_{\text{surr}}$  represents the surrounding temperature (20.1 °C);  $I$  represents the power of incident laser (0.39 w);  $A_{808}$  is the absorbance of the sample at 808 nm (0.19);  $h$ , the heat transfer coefficient;  $A$ , the surface area of the container and the value of  $hA$  is obtained by equation (2);  $Q_{\text{Dis}}$  is the heat dissipation of light absorbed by the quartz sample cell, obtained by formula (3).

$$hA = \frac{m_D C_D}{\tau_s} \quad (2)$$

$$Q_{Dis} = \frac{m_D C_D (T_{max} - T_{surr})}{\tau_s} \quad (3)$$

$m_D$  and  $C_D$  are the mass (8 mg) and heat capacity (0.8 J/g) of the sample respectively,  $\tau_s$  (the time constant of heat transfer in the system) can be obtained from equation (4).

$$t = -\tau_s \ln \theta = -\tau_s \ln \left( \frac{T_t - T_{surr}}{T_{Max} - T_{surr}} \right) \quad (4)$$

The variable  $t$  in equation (4) is the cooling time point after continuous irradiation,  $T_t$  is the temperature at the corresponding time point in the cooling process, and  $\tau_s$  is 29.7s. By calculation, the photothermal efficiency of compound **CTC-2OH** is 35.4 %.
